# Supplementary material
Source: PubMed Central journal article supplement (PMC3060286)
Supplement: NIHMS258166-supplement-Supp_Fig_S1.pdf [file NIHMS258166-supplement-Supp_Fig_S1.pdf]

*Ltbp3*

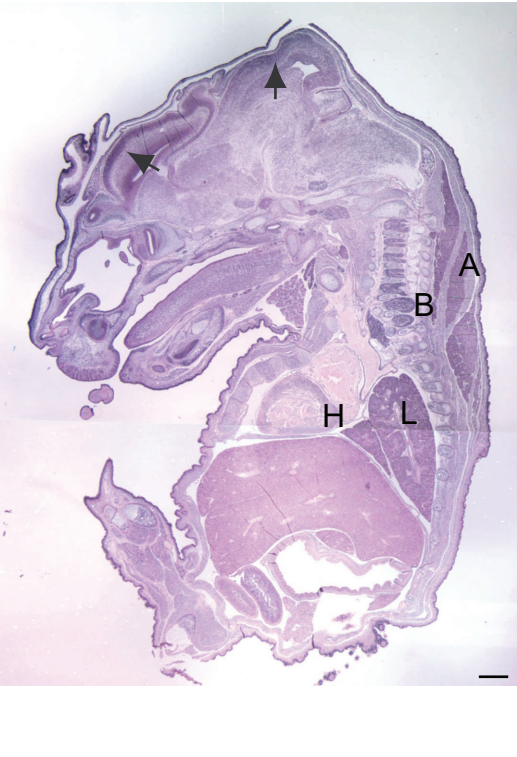

*Ltbp4*

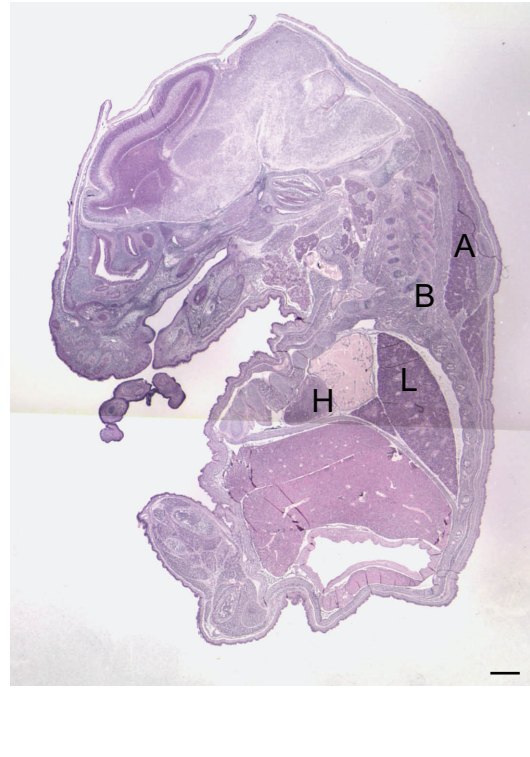

**Supplemental Figure 1.** Expression of *Ltbp3* and *Ltbp4* in mouse embryos. In situ hybridization (ISH) was performed on parasagittal sections of E16.5 embryos. The expression patterns of *Ltbp3* and *Ltbp4* are similar and both transcripts are detected at higher levels in developing lungs (L), bones (B), heart (H) and brown adipose tissue (A). *Ltbp3* is also expressed in some regions of the brain (arrowheads). Bars: 500  $\mu$ m.
