# Supplementary material
Source: PubMed Central journal article supplement (PMC3060286)
Supplement: NIHMS258166-supplement-Supp_Fig_S2.pdf [file NIHMS258166-supplement-Supp_Fig_S2.pdf]

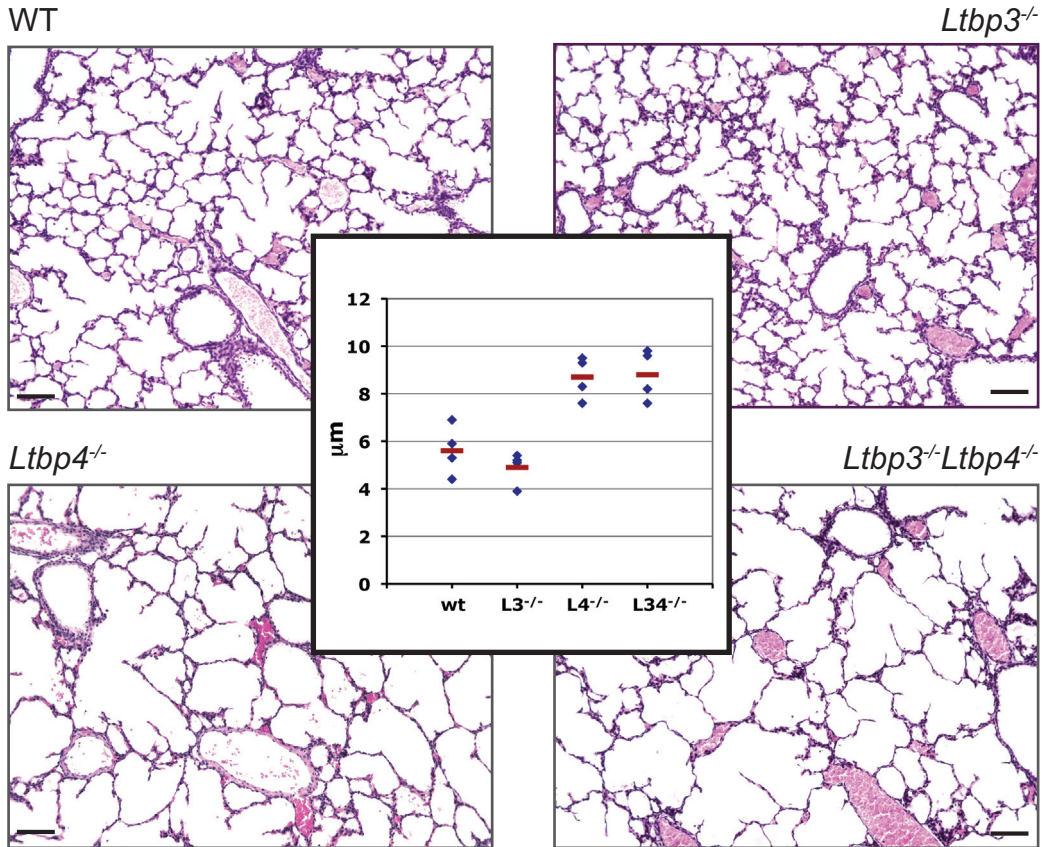

**Supplemental Figure 2.** Histomorphometric studies of *Ltbp3<sup>-/-</sup>*, *Ltbp4S<sup>-/-</sup>* and *Ltbp3<sup>-/-</sup>;Ltbp4S<sup>-/-</sup>* lungs in newborn mice. Histomorphometric studies showed no difference between WT and *Ltbp3<sup>-/-</sup>* lungs at P0.5, as measured by average terminal air-sac diameter. There was an increase of about 60% in average air sac diameter in *Ltbp4S<sup>-/-</sup>* and *Ltbp3<sup>-/-</sup>;Ltbp4S<sup>-/-</sup>* compared to WT ( $P \leq 0.005$ ,  $P \leq 0.005$ ) and *Ltbp3<sup>-/-</sup>* ( $P \leq 0.0007$ ,  $P \leq 0.0016$ ) newborn mice. However, there was no difference between *Ltbp4S<sup>-/-</sup>* and *Ltbp3<sup>-/-</sup>;Ltbp4S<sup>-/-</sup>* lungs ( $P \leq 0.863$ ). Four animals of each genotype were analyzed in this study. Bars: 50 µm.
