# Supplementary material
Source: PubMed Central journal article supplement (PMC3060286)
Supplement: NIHMS258166-supplement-Supp_Fig_S3.pdf [file NIHMS258166-supplement-Supp_Fig_S3.pdf]

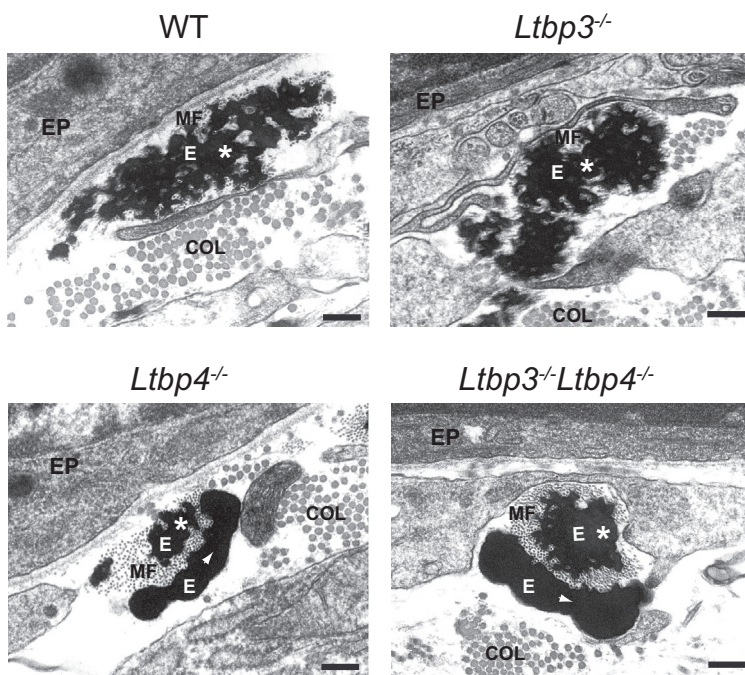

**Supplemental Figure 3.** Ultrastructure of elastic fibers in P0.5 mouse lungs. Electron microscopic images show microfibrils enmeshed in the elastin (asterisks) in WT and *Ltbp3*<sup>-/-</sup> lung airways, subjacent to airway epithelium. In *Ltbp4*<sup>-/-</sup> and *Ltbp3*<sup>-/-</sup>;*Ltbp4*<sup>-/-</sup> airways elastin is incorporated into microfibrils only in part, and large globules of elastin localize next to the microfibrils (arrowheads). COL- Collagen, EP – epithelial cell, E- elastin, MF- microfibrils. Bars: 0.1 μm,
