# Supplementary material
Source: PubMed Central journal article supplement (PMC3060286)
Supplement: NIHMS258166-supplement-Supp_Fig_S4.pdf [file NIHMS258166-supplement-Supp_Fig_S4.pdf]

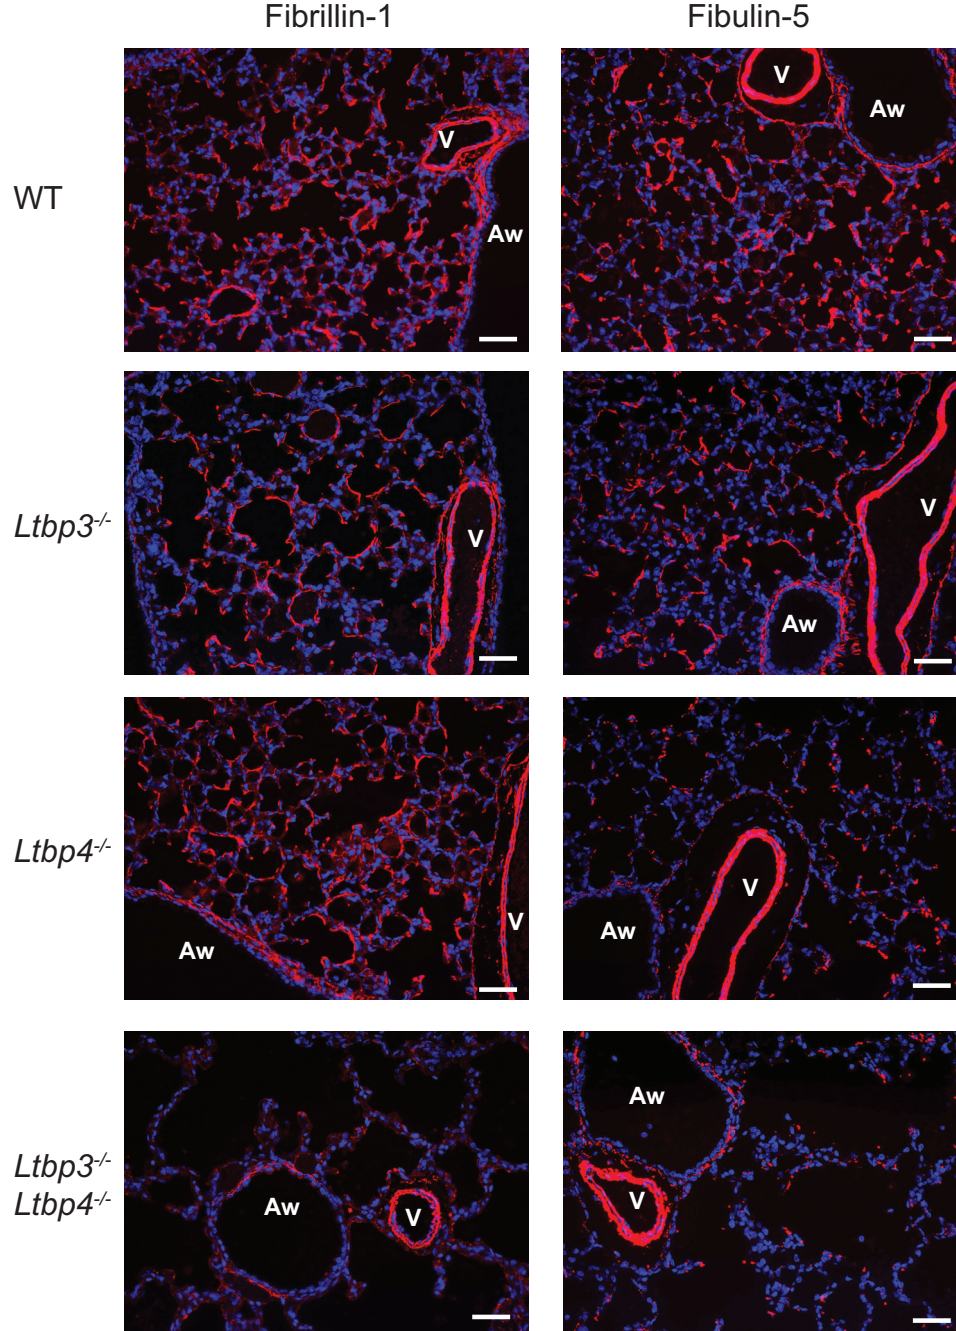

Supplemental Figure 4. Distribution of fibrillin-1 and fibulin-5 in WT, *Ltbp3*<sup>-/-</sup>, *Ltbp4S*<sup>-/-</sup>, and *Ltbp3*<sup>-/-</sup>;*Ltbp4S*<sup>-/-</sup> lungs at P7. Large amounts of fibrillin-1 were detected in the walls of pulmonary blood vessels and subjacent to the airway epithelium in WT, *Ltbp3*<sup>-/-</sup>, *Ltbp4S*<sup>-/-</sup>, and *Ltbp3*<sup>-/-</sup>;*Ltbp4S*<sup>-/-</sup> lungs. Fibrillin-1 fibers were observed in the walls of terminal air sacs/alveoli in WT, *Ltbp3*<sup>-/-</sup>, and *Ltbp4S*<sup>-/-</sup> animals, but were almost undetectable in the the air sac walls in *Ltbp3*<sup>-/-</sup>;*Ltbp4S*<sup>-/-</sup> lungs. At P7 fibulin-5 is detected in the lamellae between SMCs in blood vessel walls, in the fibers subjacent to the airway epithelium, at the tips of the growing septae, and in the walls of terminal air sacs. In the lungs of *Ltbp4S*<sup>-/-</sup> and *Ltbp3*<sup>-/-</sup>;*Ltbp4S*<sup>-/-</sup> mice the fragmented lamellae between the SMCs in blood vessels. Bars: 50μm.
